# Supplementary material for: Temporal Trends and Geographic Variability in the Prescription of Antiretroviral Treatments in People Living with HIV in Spain, 2004–2020
Source: MDPI journal article supplement (doi:10.3390/jcm11071896), 2022-03-29
Supplement: s1 [file s1]

## Supplementary Material

Table S1. Patients' characteristics at ART initiation according to the period of ART initiation.

|                                               | <b>2004-2007<br/>n= 1,712</b> | <b>2008-2011<br/>n= 3,566</b> | <b>2012-2015<br/>n= 4,266</b> | <b>2016-2020<br/>n= 5,074</b> | <b>p-value</b> |
|-----------------------------------------------|-------------------------------|-------------------------------|-------------------------------|-------------------------------|----------------|
| <b>Sex at birth; n (%)</b>                    |                               |                               |                               |                               |                |
| Male                                          | 1,296 (75.7)                  | 2,900 (81.3)                  | 3,743 (87.7)                  | 4,453 (87.8)                  | <0.001         |
| Female                                        | 416 (24.3)                    | 666 (18.7)                    | 523 (12.3)                    | 621 (12.2)                    |                |
| <b>Age at ART initiation (years); n (%)</b>   |                               |                               |                               |                               |                |
| <30                                           | 341 (19.9)                    | 816 (22.9)                    | 1,086 (25.5)                  | 1,469 (28.9)                  | <0.001         |
| 30-40                                         | 657 (38.4)                    | 1,368 (38.4)                  | 1,587 (37.2)                  | 1,734 (34.2)                  |                |
| >40                                           | 714 (41.7)                    | 1,382 (38.7)                  | 1,593 (37.3)                  | 1,871 (36.9)                  |                |
| Median (Q1, Q3)                               | 38.1 (31.5, 44.6)             | 37.0 (30.6,44.3)              | 36.3 (29.8, 43.9)             | 35.8 (28.9,44.5)              |                |
| <b>Education level; n (%)</b>                 |                               |                               |                               |                               |                |
| Elementary studies                            | 104 (6.0)                     | 123 (3.4)                     | 91 (2.1)                      | 103 (2.0)                     | <0.001         |
| Primary                                       | 201 (11.7)                    | 357 (10.0)                    | 450 (10.5)                    | 488 (9.6)                     |                |
| Secondary                                     | 403 (23.5)                    | 660 (18.5)                    | 679 (15.9)                    | 559 (11.0)                    |                |
| High School                                   | 458 (26.7)                    | 1,000 (28.0)                  | 1,175 (27.5)                  | 1,430 (28.2)                  |                |
| Upper education                               | 238 (13.9)                    | 840 (23.6)                    | 1,151 (26.9)                  | 1,362 (26.8)                  |                |
| Others                                        | 37 (2.2)                      | 63 (1.8)                      | 74 (1.7)                      | 65 (1.3)                      |                |
| Unknown                                       | 271 (15.8)                    | 523 (14.7)                    | 646 (15.1)                    | 1,067 (21.0)                  |                |
| <b>HIV transmission mode; n (%)</b>           |                               |                               |                               |                               |                |
| Men sex with men                              | 610 (35.6)                    | 1,955 (54.8)                  | 2,867 (67.2)                  | 3,404 (67.1)                  | <0.001         |
| Heterosexual                                  | 730 (42.6)                    | 1,187 (33.3)                  | 1,059 (24.8)                  | 1,273 (25.1)                  |                |
| Injection drug use                            | 312 (18.2)                    | 316 (8.9)                     | 172 (4.0)                     | 124 (2.4)                     |                |
| Other/Unknown                                 | 60 (3.5)                      | 108 (3.0)                     | 168 (3.9)                     | 273 (5.4)                     |                |
| <b>Clinical AIDS at ART initiation; n (%)</b> |                               |                               |                               |                               |                |

|                                    |              |              |              |              |        |
|------------------------------------|--------------|--------------|--------------|--------------|--------|
| No                                 | 1,682 (98.2) | 3,508 (98.4) | 4,215 (98.8) | 5,007 (98.7) | 0.209  |
| Yes                                | 30 (1.8)     | 58 (1.6)     | 51 (1.2)     | 67(1.3)      |        |
| <b>Region of birth; n (%)</b>      |              |              |              |              |        |
| Spain                              | 1,039 (60.7) | 2,075 (58.2) | 2,633 (61.7) | 2,803 (55.2) | <0.001 |
| Latin America                      | 269 (15.7)   | 666 (18.7)   | 735 (17.2)   | 1,416 (27.9) |        |
| Western Europe                     | 221 (12.9)   | 469 (13.1)   | 588 (13.8)   | 407 (8.0)    |        |
| Eastern Europe                     | 27 (1.6)     | 94 (2.6)     | 82 (1.9)     | 99 (1.9)     |        |
| Sub-Saharan Africa                 | 127 (7.4)    | 201 (5.6)    | 139 (3.3)    | 210 (4.1)    |        |
| Northern Africa                    | 24 (1.4)     | 45 (1.3)     | 35 (0.8)     | 74 (1.4)     |        |
| Other                              | 3 (0.2)      | 12 (0.3)     | 28 (0.7)     | 32 (0.6)     |        |
| Unknown                            | 2 (0.1)      | 4 (0.1)      | 26 (0.6)     | 33 (0.6)     |        |
| <b>Autonomous regions**; n (%)</b> |              |              |              |              |        |
| 1                                  | 724 (42.3)   | 1,421 (39.8) | 1,441 (33.8) | 1,951 (38.5) | <0.001 |
| 2                                  | 195 (11.4)   | 397 (11.1)   | 452 (10.6)   | 564 (11.1)   |        |
| 3                                  | 0 (0.0)      | 2 (0.1)      | 70 (1.6)     | 190 (3.7)    |        |
| 4                                  | 10 (0.6)     | 74 (2.1)     | 52 (1.2)     | 47 (0.9)     |        |
| 5                                  | 133 (7.7)    | 284 (7.9)    | 354 (8.3)    | 329 (6.5)    |        |
| 6                                  | 123 (7.2)    | 269 (7.5)    | 454 (10.6)   | 485 (9.6)    |        |
| 7                                  | 65 (3.8)     | 130 (3.6)    | 83 (1.9)     | 134 (2.6)    |        |
| 8                                  | 0 (0.0)      | 82 (2.3)     | 129 (3.0)    | 103 (2.0)    |        |
| 9                                  | 255 (14.9)   | 571 (16.0)   | 796 (18.7)   | 769 (15.2)   |        |
| 10                                 | 71 (4.1)     | 75 (2.1)     | 68 (1.6)     | 71 (1.4)     |        |
| 11                                 | 14 (0.8)     | 38 (1.1)     | 22 (0.5)     | 9 (0.2)      |        |
| 12                                 | 48 (2.8)     | 76 (2.1)     | 140 (3.3)    | 152 (3.0)    |        |
| 13                                 | 74 (4.3)     | 147 (4.1)    | 205 (4.8)    | 267 (5.3)    |        |
| 14                                 | 0 (0.0)      | 0 (0.0)      | 0 (0.0)      | 3 (0.1)      |        |

\*Abbreviations: Q1, 1st quartile; Q3, 3rd quartile.

\*\* The names of the AR cannot be disclosed due to confidentiality reasons.

Table S2. Temporal trends in the prescription of the first-line antiretroviral regimen, 2004-2020

[illegible]

| 2010            |     |      | 2011            |     |      | 2012            |     |      | 2013             |     |      | 2014             |     |      | 2015             |     |      |
|-----------------|-----|------|-----------------|-----|------|-----------------|-----|------|------------------|-----|------|------------------|-----|------|------------------|-----|------|
| ART             | N   | %    | ART             | N   | %    | ART             | N   | %    | ART              | N   | %    | ART              | N   | %    | ART              | N   | %    |
| TDF/FTC/EFV     | 425 | 45.2 | TDF/FTC/EFV     | 494 | 48.6 | TDF/FTC/EFV     | 436 | 53.9 | TDF/FTC/EFV      | 288 | 28.0 | TDF/FTC/RPV      | 324 | 27.9 | TDF/FTC/EVG/COBI | 279 | 22.1 |
| TDF/FTC+DRV+RTV | 161 | 17.1 | TDF/FTC+DRV+RTV | 151 | 14.9 | TDF/FTC+DRV+RTV | 106 | 13.1 | TDF/FTC/RPV      | 241 | 23.4 | FTC/TDF/EFV      | 172 | 14.8 | ABC/3TC/DTG      | 271 | 21.4 |
| TDF/FTC+RAL     | 84  | 8.9  | TDF/FTC+ATV+RTV | 80  | 7.9  | TDF/FTC+ATV+RTV | 51  | 6.3  | TDF/FTC+DRV+RTV  | 154 | 15.0 | TDF/FTC+DRV+RTV  | 163 | 14.0 | TDF/FTC/RPV      | 216 | 17.1 |
| TDF/FTC+ATV+RTV | 57  | 6.1  | TDF/FTC+RAL     | 35  | 3.4  | TDF/FTC+RAL     | 36  | 4.5  | TDF/FTC+RAL      | 76  | 7.4  | TDF/FTC+RAL      | 113 | 9.7  | TDF/FTC+DRV+RTV  | 112 | 8.9  |
| TDF/FTC+LPV/R   | 38  | 4.0  | ABC/3TC/DTG     | 32  | 3.2  | TDF/FTC+LPV/R   | 24  | 3.0  | TDF/FTC+ATV+RTV  | 40  | 3.9  | TDF/FTC/EVG/COBI | 72  | 6.2  | TDF/FTC+DTG      | 97  | 7.7  |
| TDF/FTC+NVP     | 29  | 3.1  | TDF/FTC+LPV/R   | 32  | 3.2  | ABC/3TC+EFV     | 14  | 1.7  | ABC/3TC+ATV+RTV  | 21  | 2.0  | TDF/FTC+ATV+RTV  | 41  | 3.5  | TDF/FTC/EFV      | 57  | 4.5  |
| ABC/3TC+NVP     | 19  | 2.0  | Clinical Trial  | 21  | 2.1  | DRV+RTV+MVC     | 13  | 1.6  | ABC/3TC+RAL      | 21  | 2.0  | ABC/3TC+DRV+RTV  | 39  | 3.4  | TDF/FTC+RAL      | 50  | 4.0  |
| ABC/3TC+EFV     | 15  | 1.6  | TDF/FTC+NVP     | 20  | 2.0  | ABC/3TC+ATV+RTV | 12  | 1.5  | ABC/3TC+DRV+RTV  | 19  | 1.8  | ABC/3TC/DTG      | 38  | 3.3  | Clinical Trial   | 27  | 2.1  |
| ABC/3TC+ATV+RTV | 13  | 1.4  | ABC/3TC+DRV+RTV | 19  | 1.9  | ABC/3TC+DRV+RTV | 12  | 1.5  | TDF/FTC+NVP      | 19  | 1.8  | Clinical Trial   | 36  | 3.1  | ABC/3TC+RAL      | 20  | 1.6  |
| ATV+RTV+MVC     | 11  | 1.2  | ATV+RTV+MVC     | 18  | 1.8  | TDF/FTC+ETR     | 12  | 1.5  | ABC/3TC+EFV      | 16  | 1.6  | ABC/3TC+RAL      | 36  | 3.1  | ABC/3TC+DRV+RTV  | 17  | 1.3  |
| AZT/3TC+LPV/R   | 10  | 1.1  | ABC/3TC+ATV+RTV | 12  | 1.2  | ABC/3TC+NVP     | 11  | 1.4  | ABC/3TC+NVP      | 16  | 1.6  | ABC/3TC+RPV      | 36  | 3.1  | ABC/3TC+RPV      | 17  | 1.3  |
| OTHER           | 79  | 8.4  | OTHER           | 103 | 10.1 | TDF/FTC+NVP     | 11  | 1.4  | TDF/FTC/EVG/COBI | 15  | 1.5  | ABC/3TC+EFV      | 14  | 1.2  | ABC/3TC+EFV      | 16  | 1.3  |
|                 |     |      |                 |     |      | ABC/3TC+RAL     | 10  | 1.2  | TDF/FTC+LPV/R    | 15  | 1.5  | ABC/3TC+ATV+RTV  | 13  | 1.1  | TDF/FTC+DRV/COBI | 16  | 1.3  |
|                 |     |      |                 |     |      | ABC/3TC+DTG     | 9   | 1.1  | ABC/3TC+LPV/R    | 12  | 1.2  | ABC/3TC+CAB      | 12  | 1.0  | TDF/FTC+DOR      | 16  | 1.3  |
|                 |     |      |                 |     |      | TDF/FTC+DTG     | 9   | 1.1  | OTHER            | 77  | 7.5  | OTHER            | 54  | 4.6  | TDF/FTC+ATV+RTV  | 15  | 1.2  |
|                 |     |      |                 |     |      | OTHER           | 43  | 5.3  |                  |     |      |                  |     |      | OTHER            | 38  | 3.0  |

| 2016             |     |      | 2017             |     |      | 2018             |     |      | 2019             |     |      | 2020             |     |      |
|------------------|-----|------|------------------|-----|------|------------------|-----|------|------------------|-----|------|------------------|-----|------|
| ART              | N   | %    |
| ABC/3TC/DTG      | 426 | 37.0 | ABC/3TC/DTG      | 412 | 34.1 | ABC/3TC/DTG      | 322 | 30.0 | TAF/FTC/BIC      | 335 | 32.1 | TAF/FTC/BIC      | 319 | 53.6 |
| TAF/FTC/EVG/COBI | 153 | 13.3 | TAF/FTC/EVG/COBI | 328 | 27.1 | TAF/FTC/EVG/COBI | 260 | 24.2 | ABC/3TC/DTG      | 177 | 16.9 | DTG/3TC          | 143 | 24.0 |
| TDF/FTC/EVG/COBI | 137 | 11.9 | TDF/FTC+DTG      | 154 | 12.7 | TDF/FTC+DTG      | 171 | 15.9 | TAF/FTC/DRV/COBI | 144 | 13.8 | TDF/FTC+DTG      | 43  | 7.2  |
| TDF/FTC+DTG      | 111 | 9.6  | TDF/FTC+DRV/COBI | 47  | 3.9  | TAF/FTC+DTG      | 83  | 7.7  | DTG/3TC          | 123 | 11.8 | TAF/FTC/DRV/COBI | 25  | 4.2  |
| TDF/FTC/RPV      | 71  | 6.2  | TDF/FTC+RAL      | 47  | 3.9  | TAF/FTC/DRV/COBI | 67  | 6.2  | TDF/FTC+DTG      | 114 | 10.9 | ABC/3TC/DTG      | 22  | 3.7  |
| TDF/FTC+DRV/COBI | 40  | 3.5  | TDF/FTC/RPV      | 45  | 3.7  | TDF/FTC+RAL      | 45  | 4.2  | TAF/FTC/EVG/COBI | 51  | 4.9  | TDF/FTC+RAL      | 13  | 2.2  |
| TDF/FTC+DRV+RTV  | 37  | 3.2  | TDF/FTC+DRV+RTV  | 30  | 2.5  | TDF/FTC+DRV+RTV  | 23  | 2.1  | TAF/FTC+DTG      | 30  | 2.9  | TAF/FTC+DTG      | 9   | 1.5  |
| Clinical Trial   | 36  | 3.1  | DTG+3TC          | 21  | 1.7  | TAF/FTC+RAL      | 19  | 1.8  | TDF/FTC+RAL      | 24  | 2.3  | OTHER            | 21  | 3.5  |
| TDF/FTC+RAL      | 36  | 3.1  | TAF/FTC/DRV/COBI | 16  | 1.3  | TDF/FTC/RPV      | 18  | 1.7  | OTHER            | 47  | 4.5  |                  |     |      |
| TDF/FTC/EFV      | 15  | 1.3  | TAF/FTC+DTG      | 16  | 1.3  | TDF/FTC+DRV/COBI | 14  | 1.3  |                  |     |      |                  |     |      |
| TAF/FTC/DRV/COBI | 14  | 1.2  | Clinical Trial   | 15  | 1.2  | TAF/FTC/RPV      | 14  | 1.3  |                  |     |      |                  |     |      |
| DTG+3TC          | 13  | 1.1  | OTHER            | 78  | 6.5  | DTG+3TC          | 12  | 1.1  |                  |     |      |                  |     |      |
| OTHER            | 63  | 5.5  |                  |     |      | OTHER            | 25  | 2.3  |                  |     |      |                  |     |      |

Table S3. Temporal trends in the ART regimens received among all patients on treatment, 2004-2020

[illegible]

| 2010            |      |      | 2011            |      |      | 2012            |       |      | 2013            |       |      | 2014             |       |      | 2015             |       |      |
|-----------------|------|------|-----------------|------|------|-----------------|-------|------|-----------------|-------|------|------------------|-------|------|------------------|-------|------|
| ART             | N    | %    | ART             | N    | %    | ART             | N     | %    | ART             | N     | %    | ART              | N     | %    | ART              | N     | %    |
| TDF/FTC/EFV     | 1570 | 41.3 | TDF/FTC/EFV     | 1975 | 42.3 | TDF/FTC/EFV     | 2,293 | 43.2 | TDF/FTC/EFV     | 2,371 | 38.9 | TDF/FTC/EFV      | 2,006 | 28.5 | TDF/FTC/EFV      | 1751  | 21.6 |
| TDF/FTC+LPV/R   | 379  | 10.0 | TDF/FTC+DRV+RTV | 426  | 9.1  | TDF/FTC+DRV+RTV | 517   | 9.7  | TDF/FTC+DRV+RTV | 598   | 9.8  | TDF/FTC+RPV      | 1,219 | 17.3 | TDF/FTC+RPV      | 1,661 | 20.5 |
| TDF/FTC+DRV+RTV | 251  | 6.6  | TDF/FTC+LPV/R   | 322  | 6.9  | TDF/FTC+ATV+RTV | 327   | 6.2  | TDF/FTC+ATV+RTV | 329   | 5.4  | TDF/FTC+DRV+RTV  | 632   | 9.0  | TDF/FTC+DRV+RTV  | 600   | 7.4  |
| TDF/FTC+ATV+RTV | 233  | 6.1  | TDF/FTC+ATV+RTV | 282  | 6.0  | TDF/FTC+LPV/R   | 282   | 5.3  | TDF/FTC+RAL     | 267   | 4.4  | TDF/FTC+RAL      | 340   | 4.8  | TDF/FTC+EVG/COBI | 459   | 5.7  |
| TDF/FTC+NVP     | 195  | 5.1  | TDF/FTC+NVP     | 231  | 5.0  | TDF/FTC+NVP     | 230   | 4.3  | TDF/FTC+RPV     | 262   | 4.3  | TDF/FTC+ATV+RTV  | 292   | 4.2  | ABC/3TC/DTG      | 421   | 5.2  |
| TDF/FTC+RAL     | 140  | 3.7  | TDF/FTC+RAL     | 182  | 3.9  | TDF/FTC+RAL     | 198   | 3.7  | TDF/FTC+NVP     | 239   | 3.9  | TDF/FTC+NVP      | 200   | 2.8  | TDF/FTC+RAL      | 316   | 3.9  |
| ABC/3TC+EFV     | 125  | 3.3  | ABC/3TC+EFV     | 130  | 2.8  | ABC/3TC+EFV     | 140   | 2.6  | TDF/FTC+LPV/R   | 205   | 3.4  | ABC/3TC+NVP      | 162   | 2.3  | ABC/3TC+RPV      | 254   | 3.1  |
| ABC/3TC+NVP     | 95   | 2.5  | ABC/3TC+NVP     | 112  | 2.4  | TDF/FTC+ETR     | 127   | 2.4  | TDF/FTC+ETR     | 160   | 2.6  | ABC/3TC+DRV+RTV  | 159   | 2.3  | TDF/FTC+ATV+RTV  | 220   | 2.7  |
| TDF/FTC+FPV+RTV | 86   | 2.3  | ABC/3TC+ATV+RTV | 91   | 2.0  | ABC/3TC+NVP     | 124   | 2.3  | ABC/3TC+EFV     | 159   | 2.6  | ABC/3TC+EFV      | 157   | 2.2  | ABC/3TC+EFV      | 188   | 2.3  |
| ABC/3TC+ATV+RTV | 83   | 2.2  | TDF/FTC+ETR     | 67   | 1.4  | ABC/3TC+ATV+RTV | 99    | 1.9  | ABC/3TC+NVP     | 148   | 2.4  | TDF/FTC+LPV/R    | 149   | 2.1  | ABC/3TC+RAL      | 180   | 2.2  |
| ABC/3TC+LPV/R   | 65   | 1.7  | TDF/FTC+FPV+RTV | 66   | 1.4  | ABC/3TC+DRV+RTV | 82    | 1.6  | ABC/3TC+ATV+RTV | 118   | 1.9  | TDF/FTC+ETR      | 127   | 1.8  | ABC/3TC+DRV+RTV  | 177   | 2.2  |
| AZT/3TC+LPV/R   | 44   | 1.2  | ABC/3TC+DRV+RTV | 61   | 1.3  | ABC/3TC+LPV/R   | 61    | 1.2  | ABC/3TC+DRV+RTV | 113   | 1.9  | ABC/3TC+ATV+RTV  | 120   | 1.7  | TDF/FTC+NVP      | 164   | 2.0  |
| OTHER           | 532  | 14.0 | ABC/3TC+LPV/R   | 55   | 1.2  | TDF/FTC+FPV+RTV | 56    | 1.1  | ABC/3TC+ETR     | 79    | 1.3  | ABC/3TC+RAL      | 119   | 1.7  | ABC/3TC+NVP      | 154   | 1.9  |
|                 |      |      | OTHER           | 669  | 14.3 | ABC/3TC+ETR     | 54    | 1.0  | ABC/3TC+LPV/R   | 75    | 1.2  | TDF/FTC+EVG/COBI | 114   | 1.6  | TDF/FTC+DTG      | 131   | 1.6  |
|                 |      |      |                 |      |      | OTHER           | 716   | 13.5 | ABC/3TC+RAL     | 68    | 1.1  | ABC/3TC+RPV      | 107   | 1.5  | ABC/3TC+ATV+RTV  | 107   | 1.3  |
|                 |      |      |                 |      |      |                 |       |      | OTHER           | 908   | 14.9 | ABC/3TC/DTG      | 91    | 1.3  | TDF/FTC+ LPV/R   | 103   | 1.3  |
|                 |      |      |                 |      |      |                 |       |      |                 |       |      | ABC/3TC+ETR      | 87    | 1.2  | TDF/FTC+ETR      | 97    | 1.2  |
|                 |      |      |                 |      |      |                 |       |      |                 |       |      | OTHER            | 956   | 13.6 | ABC/3TC+ETR      | 84    | 1.0  |
|                 |      |      |                 |      |      |                 |       |      |                 |       |      |                  |       |      | OTHER            | 1,028 | 12.7 |





Table S4. Marketing dates of selected antiretroviral drugs in Spain (January 2022)

| Name                                                                  | Date of authorisation | Brand name | Withdrawal date |
|-----------------------------------------------------------------------|-----------------------|------------|-----------------|
| <i>Nucleoside/Nucleotide Reverse Transcriptase Inhibitors (NRTIs)</i> |                       |            |                 |
| Zidovudine (AZT,ZDV))                                                 | 01/07/1988            | Retrovir®  |                 |
| Emtricitabine (FTC)                                                   | 02/12/2003            | Emtriva®   |                 |
| Abacabir (ABC)                                                        | 01/09/1999            | Ziagen®    |                 |
| Lamivudine (3TC)                                                      | 01/11/1996            | Epivir®    |                 |
| Stavudine (d4T)                                                       | 01/09/1996            | Zerit®     | 31/08/2020      |
| Didanosine (ddI)                                                      | 16/08/2000            | Videx®     | 17/01/2019      |
| Tenofovir disoproxil fumarate (TDF)                                   | 25/02/2002            | Viread®    |                 |
| Tenofovir Alafenamide (TAF)                                           | 25/01/2017            | Vemlidy®   |                 |
| Zalcitabine (ddC)                                                     | 01/03/1994            | Hivid®     | 20/02/2007      |
| <i>NRTIs fixed dose combinations</i>                                  |                       |            |                 |
| Abacavir/Lamivudine (ABC/3TC)                                         | 30/12/2004            | Kivexa®    |                 |
| Abacavir/Lamivudine/Zidovudine (ABC/3TC/AZT)                          | 10/04/2014            | Trizivir®  |                 |
| Emtricitabine/Tenofovir disoproxil fumarate (FTC/TDF)                 | 07/03/2005            | Truvada®   |                 |
| Emtricitabine/Tenofovir alafenamide (FTC/TAF)                         | 12/05/2016            | Descovy®   |                 |
| Lamivudine/Zidovudine (FTC/AZT)                                       | 01/11/1998            | Combivir®  |                 |

---

*Non-Nucleoside Reverse Transcriptase Inhibitors (NNRTIs)*

|                   |            |            |
|-------------------|------------|------------|
| Efavirenz (EFV)   | 01/07/1999 | Sustiva®   |
| Etravirine (ETR)  | 16/12/2011 | Intelence® |
| Nevirapine (NVP)  | 01/04/1998 | Viramune®  |
| Rilpivirine (RPV) | 13/01/2012 | Edurant®   |
| Doravirine (DOR)  | 08/02/2019 | Pifeltro®  |

*Protease inhibitors*

|                                  |            |            |            |
|----------------------------------|------------|------------|------------|
| Atazanavir (ATV)                 | 29/03/2004 | Reyataz®   |            |
| Darunavir (DRV)                  | 16/02/2009 | Prezista®  |            |
| Darunavir/Cobicistat (DRV/COBI)  | 26/12/2014 | Rezolsta®  |            |
| Fosamprenavir (FPV)              | 22/07/2004 | Telzir®    |            |
| Lopinavir/Ritonavir (LPV/r)      | 24/04/2008 | Kaletra®   |            |
| Ritonavir (RTV)                  | 15/10/2015 | Norvir®    |            |
| Atazanavir/Cobiscitat (ATV/COBI) | 30/07/2015 | Evotaz®    |            |
| Saquinavir (SQV)                 | 01/10/1996 | Invirase®  | 30/08/2018 |
| Indinavir (IDV)                  | 01/11/1996 | Crixivan®  | 06/04/2021 |
| Tipranavir (TPV)                 | 02/11/2005 | Aptivus®   |            |
| Amprenavir (APV)                 | 12/03/2001 | Agenerase® | 01/03/2008 |

---

|                                                                   |            |            |            |
|-------------------------------------------------------------------|------------|------------|------------|
| Nelfinavir (NFV)                                                  | 01/06/1998 | Viracept®  | 13/02/2012 |
| <i>Integrase inhibitors</i>                                       |            |            |            |
| Dolutegravir (DTG)                                                | 12/02/2014 | Tivicay®   |            |
| Raltegravir (RAL)                                                 | 21/12/2007 | Isentress® |            |
| Cabotegravir (CAB)                                                | 20/01/2021 | Vocabria®  |            |
| <i>CCR5 inhibitors</i>                                            |            |            |            |
| Maraviroc (MVC)                                                   | 27/09/2007 | Celsentri® |            |
| <i>Fusion inhibitors</i>                                          |            |            |            |
| Enfuvirtide (T-20)                                                | 05/06/2003 | Fuzeon®    |            |
| <i>Boosters</i>                                                   |            |            |            |
| Cobicistat (COBI)                                                 | 28/03/2014 | Tybost®    |            |
| Ritonavir (RTV)                                                   | 01/10/1996 | Norvir®    |            |
| <i>Single dose regimen</i>                                        |            |            |            |
| Efavirenz/Emtricitabine/<br>Tenofovir disoproxil (EFV/FTC/TDF)    | 21/12/2007 | Atripla®   |            |
| Rilpivirina/Emtricitabine/Tenofovir disoproxil (RPV/FTC/TDF)      | 26/01/2012 | Eviplera®  |            |
| Rilpivirina/Tenofovir alafenamide/<br>Emtricitabine (RPV/TAF/FTC) | 13/07/2016 | Odefsey®   |            |

|                                                                                                                                                                       |            |           |
|-----------------------------------------------------------------------------------------------------------------------------------------------------------------------|------------|-----------|
| Elvitegravir/cobicistat/Emtricitabine/<br>Tenofovir alafenamide (EVT/COBI/FTC/TAF)                                                                                    | 27/11/2015 | Genvoya®  |
| Elvitegravir/cobicistat/Emtricitabine/Tenofovir disoproxil (EVT/COBI/FTC/TDF)                                                                                         | 26/06/2013 | Stribild® |
| Dolutegravir/Abacavir/Lamivudine (DTG/ABC/3TC)                                                                                                                        | 15/10/2014 | Triumeq®  |
| Dolutegravir/Rilpivirina (DTG/RPV)                                                                                                                                    | 27/06/2018 | Juluca®   |
| Bictegravir /Emtricitabine/Tenofovir alafenamide (BIC/FTC/TAF)                                                                                                        | 10/07/2018 | Biktarvy® |
| Darunavir/cobicistat/Emtricitabine/<br>Tenofovir alafenamide (DRV/COBI/FTC/TAF)                                                                                       | 27/10/2017 | Symtuza®  |
| Dolutegravir/Lamivudina (DTG/3TC)                                                                                                                                     | 19/07/2019 | Dovato®   |
| <i>Origen:</i> Bot Plus. Medicines Database of the General Council of Pharmaceutical Schools (BotPlus) (date access Jan 2022) and CIMA (AEMPS) (date access Jan 2022) |            |           |

#### **Centers and investigators involved in CoRIS cohort:**

**Executive committee:** Santiago Moreno, Inma Jarrín, David Dalmau, Maria Luisa Navarro, Maria Isabel González, Federico Garcia, Eva Poveda, Jose Antonio Iribarren, Félix Gutiérrez, Rafael Rubio, Francesc Vidal, Juan Berenguer, Juan González, M Ángeles Muñoz-Fernández.

**Fieldwork data management and analysis:** Inmaculada Jarrin, Belén Alejos, Cristina Moreno, Carlos Iniesta, Marta Rava, Rebeca Izquierdo.

**BioBanK HIV Hospital General Universitario Gregorio Marañón:** M Ángeles Muñoz-Fernández, Irene Consuegra Fernández.

**Hospital General Universitario de Alicante (Alicante):** Esperanza Merino, Gema García, Irene Portilla, Iván Agea, Joaquín Portilla, José Sánchez-Payá., Juan Carlos Rodríguez, Lina Gimeno, Livia Giner, Marcos Díez, Melissa Carreres, Sergio Reus, Vicente Boix, Diego Torrús.

**Hospital Universitario de Canarias (San Cristóbal de la Laguna):** Ana López Lirola, Dácil García, Felicitas Díaz-Flores, Juan Luis Gómez, María del Mar Alonso, Ricardo Pelazas., Jehovana Hernández, María Remedios Alemán, María Inmaculada Hernández.

**Hospital Universitario Central de Asturias (Oviedo):** Víctor Asensi, Eulalia Valle, María Eugenia Rivas Carmenado, Tomás Suárez-Zarracina Secades, Laura Pérez Is.

**Hospital Universitario 12 de Octubre (Madrid):** Rafael Rubio, Federico Pulido, Otilia Bisbal, Asunción Hernando, Lourdes Domínguez, David Rial Crestelo, Laura Bermejo, Mireia Santacreu.

**Servicio de Enfermedades Infecciosas. Hospital Universitario Donostia. Instituto de Investigación BioDonostia. (Donostia-San Sebastián):** José Antonio Iribarren, Julio Arrizabalaga, María José Aramburu, Xabier Camino, Francisco Rodríguez-Arrondo, Miguel Ángel von Wichmann, Lidia Pascual Tomé, Miguel Ángel Goenaga, M<sup>a</sup> Jesús Bustinduy, Harkaitz Azkune, Maialen Ibarguren, Aitziber Lizardi, Xabier Kortajarena, M<sup>a</sup> Pilar Carmona Oyaga, Maitane Umerez Igartua.

**Hospital General Universitario De Elche (Elche):** Félix Gutiérrez, Mar Masiá, Sergio Padilla, Catalina Robledano, Joan Gregori Colomé, Araceli Adsuar, Rafael Pascual, Marta Fernández, José Alberto García, Xavier Barber, Vanessa Agullo Re, Javier Garcia Abellán, Reyes Pascual Pérez, María Roca.

**Hospital Universitari Germans Trias i Pujol (Can Ruti) (Badalona):** Roberto Muga, Arantza Sanvisens, Daniel Fuster.

**Hospital General Universitario Gregorio Marañón (Madrid):** Juan Berenguer, Juan Carlos López Bernaldo de Quirós, Isabel Gutiérrez, Margarita Ramírez, Belén Padilla, Paloma Gijón, Teresa Aldamiz-Echevarría, Francisco Tejerina, Francisco José Parras, Pascual Balsalobre, Cristina Díez, Leire Pérez Latorre, Chiara Fanciulli.

**Hospital Universitari de Tarragona Joan XXIII (Tarragona):** Francesc Vidal, Joaquín Peraire, Consuelo Viladés, Sergio Veloso, Montserrat Vargas, Montserrat Olona, Anna Rull, Verónica Alba, Elena Yeregui, Jenifer Masip, Laia Reverté.

**Hospital Universitario y Politécnico de La Fe (Valencia):** Marta Montero Alonso, José López Aldeguer, Marino Blanes Juliá, María Tasias Pitarch, Iván Castro Hernández, Eva Calabuig Muñoz, Sandra Cuéllar Tovar, Miguel Salavert Lletí, Juan Fernández Navarro.

**Hospital Universitario La Paz/IdiPAZ:** Juan González-García, José Ramón Arribas, Carmen Busca, Joanna Cano, Julen Cardañanos, Juan Miguel Castro, Ana Delgado Hierro, Luis Escosa, Iker Falces Romero, Pedro Herranz, Víctor Hontañón, Milagros García López-Hortelano, Alicia González-Baeza, Rosa de Miguel, María Luz Martín-Carbonero, Mario Mayoral, Maria Jose Mellado, Rafael Micán, Rocio Montejano, María Luisa Montes, Victoria Moreno, Ignacio Pérez-Valero, Luis Ramos Ruperto, Berta Rodés, Talía Sainz, Elena Sendagorta, Eulalia Valencia.

**Hospital San Pedro Centro de Investigación Biomédica de La Rioja (CIBIR) (Logroño):** José Ramón Blanco, José Antonio Oteo, Valvanera Ibarra, Luis Metola, Mercedes Sanz, Laura Pérez-Martínez.

**Hospital Universitario Miguel Servet (Zaragoza):** Piedad Arazo, Gloria Sampériz.

**Hospital Universitari MutuaTerrassa (Terrasa):** David Dalmau, Angels Jaén, Montse Sanmartí, Mireia Cairó, Javier Martinez-Lacasa, Pablo Velli, Roser Font, Marina Martínez, Francesco Aiello.

**Complejo Hospitalario de Navarra (Pamplona):** Maria Rivero Marcotegui, Jesús Repáraz, María Gracia Ruiz de Alda, María Teresa de León Cano, Beatriz Pierola Ruiz de Galarreta.

**Corporació Sanitària Parc Taulí (Sabadell):** María José Amengual, Gemma Navarro, Manel Cervantes Garcia, Sonia Calzado Isbert, Marta Navarro Vilasaro.

**Hospital Universitario de La Princesa (Madrid):** Ignacio de los Santos, Jesús Sanz Sanz, Ana Salas Aparicio, Cristina Sarria Cepeda, Lucio Garcia-Fraile Fraile, Enrique Martín Gayo.

**Hospital Universitario Ramón y Cajal (Madrid):**Santiago Moreno, José Luis Casado Osorio, Fernando Dronda Nuñez, Ana Moreno Zamora, Maria Jesús Pérez Elías, Carolina Gutiérrez, Nadia Madrid, Santos del Campo Terrón, Sergio Serrano Villar, Maria Jesús Vivancos Gallego, Javier Martínez Sanz, Usua Anxa Urroz, Tamara Velasco, Alejandro Vallejo.

**Hospital General Universitario Reina Sofía (Murcia):** Enrique Bernal, Alfredo Cano Sanchez, Antonia Alcaraz García, Joaquín Bravo Urbieto, Ángeles Muñoz Perez, Maria Jose Alcaraz, Maria del Carmen Villalba.

**Hospital Nuevo San Cecilio (Granada):** Federico García, José Hernández Quero, Leopoldo Muñoz Medina, Marta Alvarez, Natalia Chueca, David Vinuesa García, Clara Martinez-Montes, Carlos Guerrero Beltrán, Adolfo de Salazar Gonzalez, Ana Fuentes Lopez.

**Centro Sanitario Sandoval (Madrid):** Jorge Del Romero, Montserrat Raposo Utrilla, Carmen Rodríguez, Teresa Puerta, Juan Carlos Carrió, Mar Vera, Juan Ballesteros, Oskar Ayerdi.

**Hospital Clínico Universitario de Santiago (Santiago de Compostela):** Antonio Antela, Elena Losada.

**Hospital Universitario Son Espases (Palma de Mallorca):** Melchor Riera, María Peñaranda, M<sup>a</sup> Angels Ribas, Antoni A Campins, Carmen Vidal, Francisco Fanjul, Javier Murillas, Francisco Homar, Helem H Vilchez, Maria Luisa Martin, Antoni Payeras.

**Hospital Universitario Virgen de la Victoria (Málaga):** Jesús Santos, Cristina Gómez Ayerbe, Isabel Viciano, Rosario Palacios, Carmen Pérez López, Carmen Maria Gonzalez-Domenec.

**Hospital Universitario Virgen del Rocío (Sevilla):** Pompeyo Viciano, Nuria Espinosa, Luis Fernando López-Cortés.

**Hospital Universitario de Bellvitge (Hospitalet de Llobregat):** Daniel Podzamczar, Arkaitz Imaz, Juan Tiraboschi, Ana Silva, María Saumoy, Paula Prieto.

**Hospital Universitario Valle de Hebrón (Barcelona):** Esteban Ribera, Adrian Curran.

**Hospital Costa del Sol (Marbella):** Julián Olalla Sierra, Javier Pérez Stachowski, Alfonso del Arco, Javier de la torre, José Luis Prada, José María García de Lomas Guerrero.

**Hospital General Universitario Santa Lucía (Cartagena):** Onofre Juan Martínez, Francisco Jesús Vera, Lorena Martínez, Josefina García, Begoña Alcaraz, Amaya Jimeno.

**Complejo Hospitalario Universitario a Coruña (Chuac) (A Coruña):** Ángeles Castro Iglesias, Berta Pernas Souto, Álvaro Mena de Cea.

**Hospital Universitario Basurto (Bilbao):** Josefa Muñoz, Miren Zuriñe Zubero, Josu Mirena Baraia-Etxaburu, Sofía Ibarra Ugarte, Oscar Luis Ferrero Beneitez, Josefina López de Munain, M<sup>a</sup> Mar Cámara López, Mireia de la Peña, Miriam Lopez, Iñigo Lopez Azkarreta.

**Hospital Universitario Virgen de la Arrixaca (El Palmar):** Carlos Galera, Helena Albendin, Aurora Pérez, Asunción Iborra, Antonio Moreno, Maria Angustias Merlos, Asunción Vidal, Marisa Meca.

**Hospital de la Marina Baixa (La Vila Joiosa):** Concha Amador, Francisco Pasquau, Javier Ena, Concha Benito, Vicenta Fenoll, Concepción Gil Anguita, José Tomás Algado Rabasa.

**Hospital Universitario Infanta Sofia (San Sebastián de los Reyes):** Inés Suárez-García, Eduardo Malmierca, Patricia González-Ruano, Dolores Martín Rodrigo, M<sup>a</sup> Pilar Ruiz Seco.

**Hospital Universitario de Jaén (Jaén):** Mohamed Omar Mohamed-Balghata, María Amparo Gómez Vidal.

**Hospital San Agustín (Avilés):** Miguel Alberto de Zarraga.

**Hospital Clínico San Carlos (Madrid):** Vicente Estrada Pérez, Maria Jesús Téllez Molina, Jorge Vergas García, Juncal Pérez-Somarriba Moreno.

**Hospital Universitario Fundación Jiménez Díaz (Madrid):** Miguel Górgolas, Alfonso Cabello, Beatriz Álvarez, Laura Prieto.

**Hospital Universitario Príncipe de Asturias (Alcalá de Henares):** José Sanz Moreno, Alberto Arranz Caso, Cristina Hernández Gutiérrez, María Novella Mena.

**Hospital Clínico Universitario de Valencia (València):** María José Galindo Puerto, Ramón Fernando Vilalta, Ana Ferrer Ribera.

**Hospital Reina Sofia (Córdoba):** Antonio Rivero Román, Antonio Rivero Juárez, Pedro López López, Isabel Machuca Sánchez, Mario Frias Casas, Angela Camacho Espejo.

**Hospital Universitario Severo Ochoa (Leganés):** Miguel Cervero Jiménez, Rafael Torres Perea.

**Nuestra Señora de Valme (Sevilla):** Juan A Pineda, Pilar Rincón Mayo, Juan Macías Sanchez, Nicolás Merchante Gutierrez, Luis Miguel Real, Anais Corma Gomez, Marta Fernández Fuertes, Alejandro Gonzalez-Serna.

**Hospital Álvaro Cunqueiro (Vigo):** Eva Poveda, Alexandre Pérez, Manuel Crespo, Luis Morano, Celia Miralles, Antonio Ocampo, Guillermo Pousada.
